# Supplementary material for: Exo-Erythrocytic Development of Avian Haemosporidian Parasites in European Owls
Source: MDPI journal article supplement (doi:10.3390/ani12172212), 2022-08-28
Supplement: s1 [file s1]

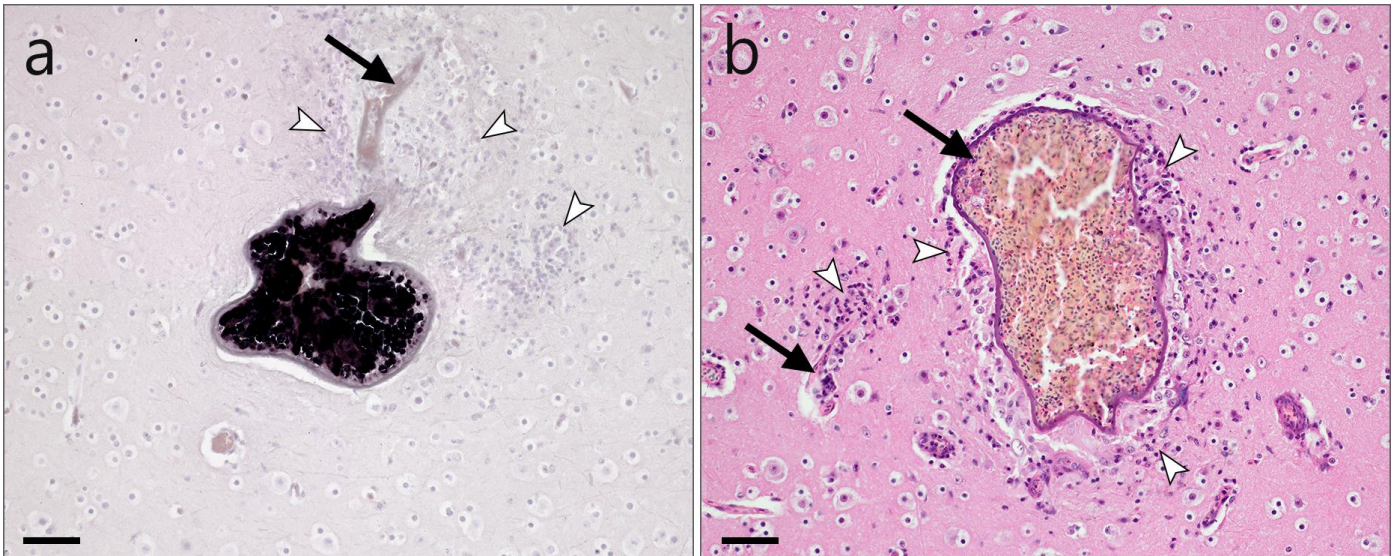

**Figure S1.** Reactive gliosis associated with a *Leucocytozoon* sp. (lineage ISTAL5) meront cluster in the brain of a Ural owl (*Strix aluco*). (a) A cluster of *Leucocytozoon* sp. (lineage ISTAL5) meronts was detected by chromogenic in situ hybridization using a ISTAL5 lineage-specific probe (dark purple staining). (b) Haematoxylin-eosin staining of an adjacent histological section depicting the same area as in (a), showing perivascular inflammation. Black arrow (→)—blood vessel, white arrowhead (▷)—gliosis. Scale bars are 50µm.
